# Supplementary material for: Enhanced removal of Cd(ii) from aqueous solution using CaCO3 nanoparticle modified sewage sludge biochar
Source: Royal Society of Chemistry journal article supplement (doi:10.1039/c7ra00324b), 2017-01-01
Supplement: c7ra00324b1.pdf [file c7ra00324b1.pdf]

## Enhanced removal of Cd(II) from aqueous solution using CaCO<sub>3</sub> nanoparticles modified sewage sludge biochar

WeiQi Zuo<sup>1,2</sup>, Chen Chen<sup>1,2</sup>, Hao-Jie Cui<sup>1,2\*</sup> and Ming-Lai Fu<sup>1,2\*</sup>

<sup>1</sup> Key Laboratory of Urban Pollutant Conversion, Institute of Urban Environment, Chinese Academy of Sciences, Xiamen 361021, China

<sup>2</sup> University of Chinese Academy of Sciences, Beijing 100039, China.

E-mail: hjcui@iue.ac.cn; mlfu@iue.ac.cn.

**Table S1** Kinetic parameters for Cd(II) adsorption on SSB and CMSSB materials

| Adsorbent | Pseudo-first-order <sup>a</sup>         |                | Pseudo-second-order <sup>b</sup>        |                | Elovich equation <sup>c</sup> |                            |                |
|-----------|-----------------------------------------|----------------|-----------------------------------------|----------------|-------------------------------|----------------------------|----------------|
|           | q <sub>e</sub><br>(mg·g <sup>-1</sup> ) | R <sup>2</sup> | q <sub>e</sub><br>(mg·g <sup>-1</sup> ) | R <sup>2</sup> | α<br>[mg/(g·min)]             | β<br>(g·mg <sup>-1</sup> ) | R <sup>2</sup> |
| SSB       | 9.60                                    | 0.935          | 10.0                                    | 0.970          | 6.68×10 <sup>5</sup>          | 1.568                      | 0.990          |
| CMSSB     | 32.1                                    | 0.964          | 33.3                                    | 0.984          | 1.06×10 <sup>7</sup>          | 0.522                      | 0.998          |

a: The kinetic model as proposed  $\log(q_e - q_t) = \log q_e - k_1 \cdot t / 2.303$ ,  $q_e$  and  $q_t$  are the amounts of Cd(II) adsorption (mg·g<sup>-1</sup>) at equilibrium and at any instant of time  $t$  (min), respectively, and  $k_1$  is the rate constant of pseudo-first-order adsorption (min<sup>-1</sup>).

b: The kinetic model as proposed  $t/q_t = 1/(k_2 \cdot q_e^2) + t/q_e$ ,  $q_e$  and  $q_t$  are the amounts of Cd(II) adsorption (mg·g<sup>-1</sup>) at equilibrium and at any instant of time  $t$  (min), respectively, and  $k_2$  is the equilibrium rate constant of pseudo-second-order adsorption (g/(mg·min)).

c: The kinetic model as proposed  $q_t = (1/\beta) \cdot \ln(\alpha \cdot \beta) + (1/\beta) \cdot \ln(t)$ ,  $q_t$  are the amounts of adsorbed Cd(II) at time  $t$ ,  $\alpha$  is the initial adsorption rate of the Elovich equation (mg/(g·min)) and  $\beta$  is the desorption constant related to the extent of surface coverage and activation energy for chemisorption (g·mg<sup>-1</sup>).

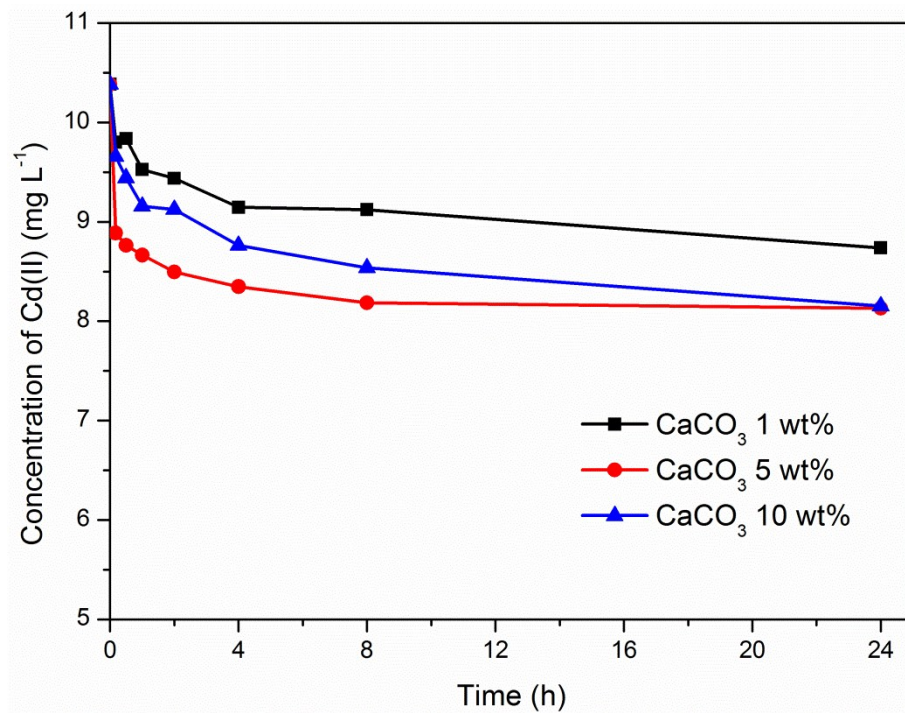

**Fig. S1** Adsorption kinetics of Cd(II) onto the CMSSB materials with different CaCO<sub>3</sub>/SSB ratio (wt/wt): adsorbent dose, 0.1 g·L<sup>-1</sup>; Cd(II) concentration, 10.4 mg·L<sup>-1</sup>; initial pH 6.0.

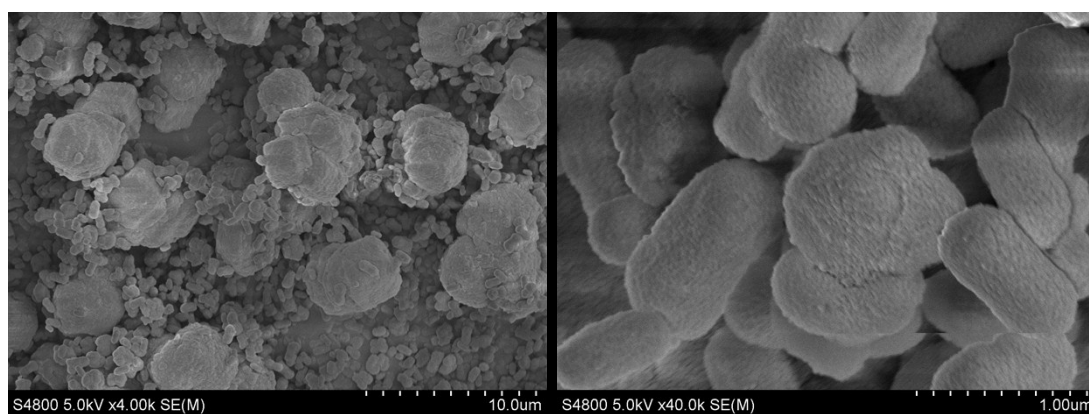

**Fig. S2** SEM images of the as-obtained calcite in the absence of SSB.

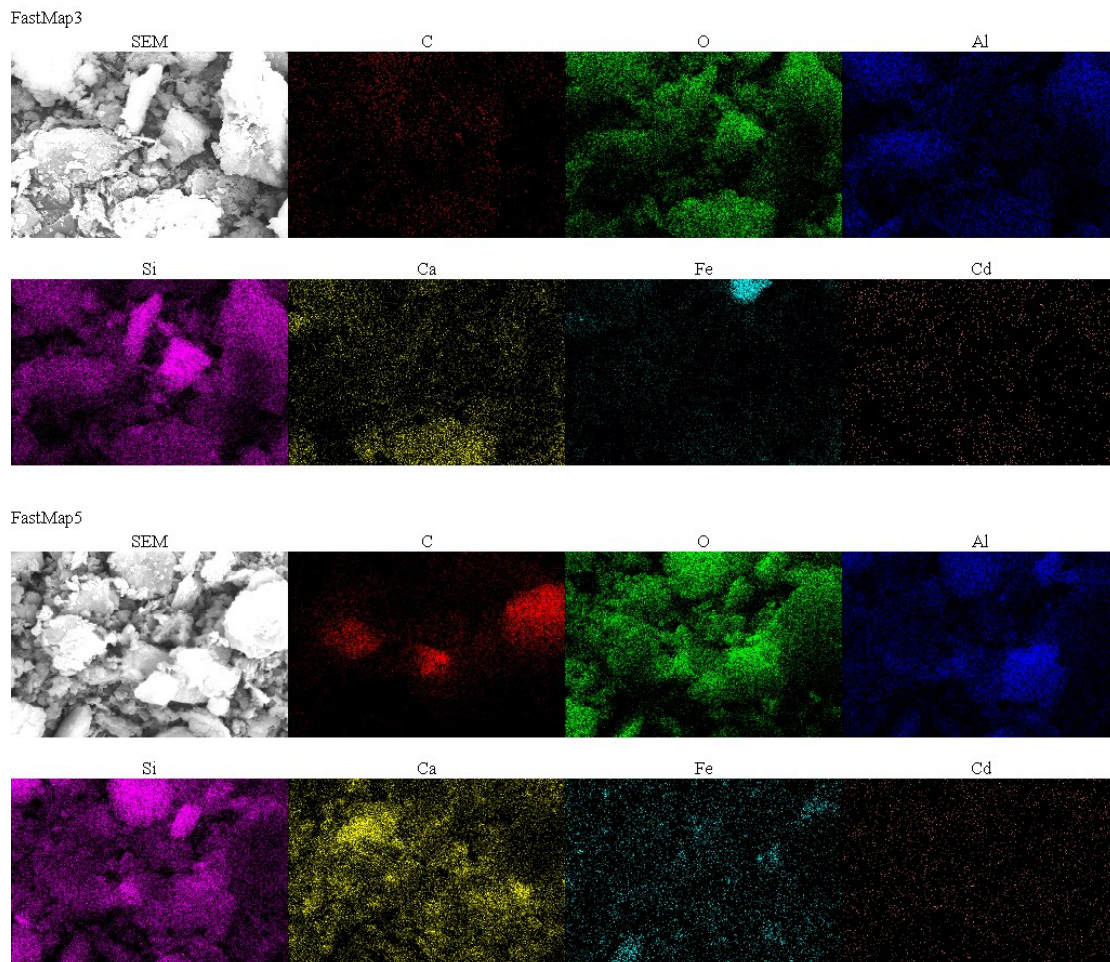

**Fig. S3** SEM images and elemental mapping of SSB and CMSSB samples.

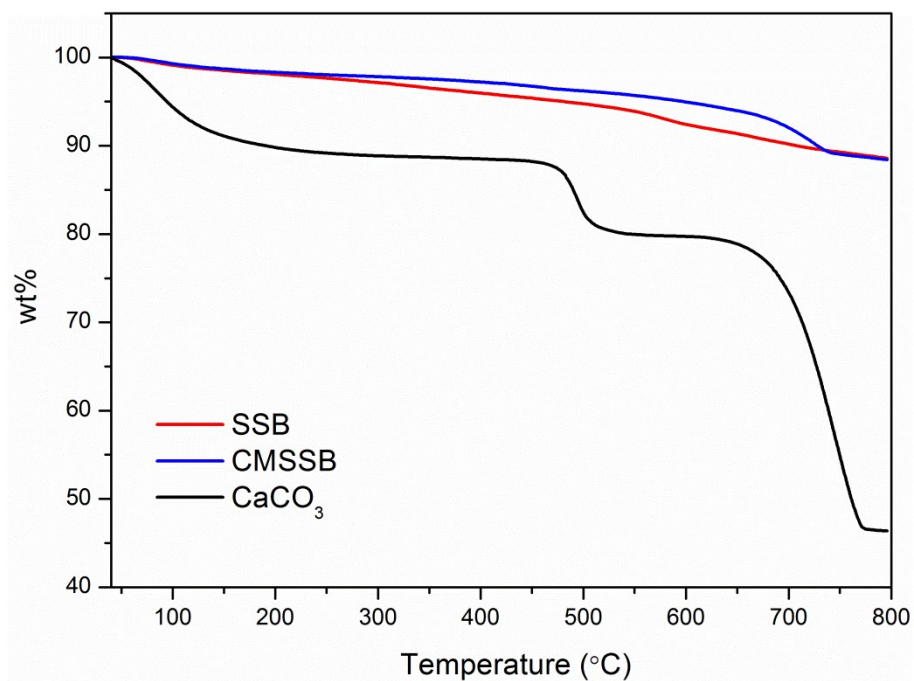

**Fig. S4** TG curves of the samples at a heating rate of 10 °C/min in N<sub>2</sub>.

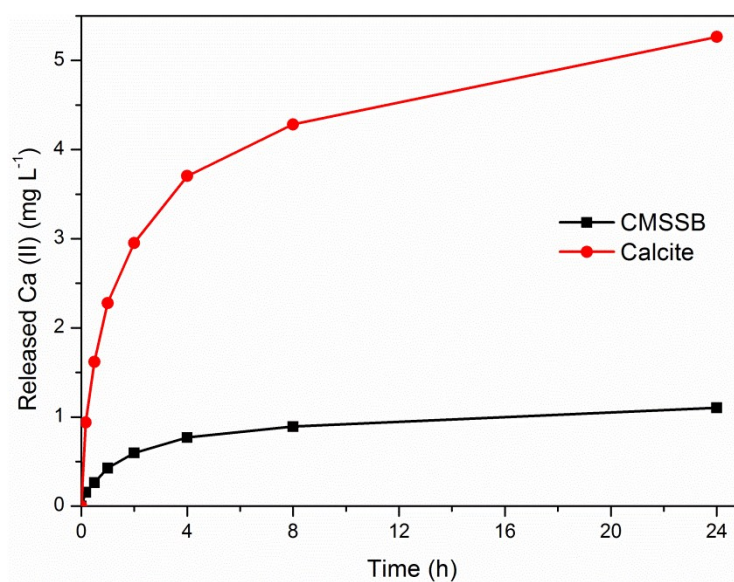

**Fig. S5** Dissolution kinetics of calcite and CMSSB samples in water at pH 5.0 (adsorbents: 15 mg; water: 150 mL).

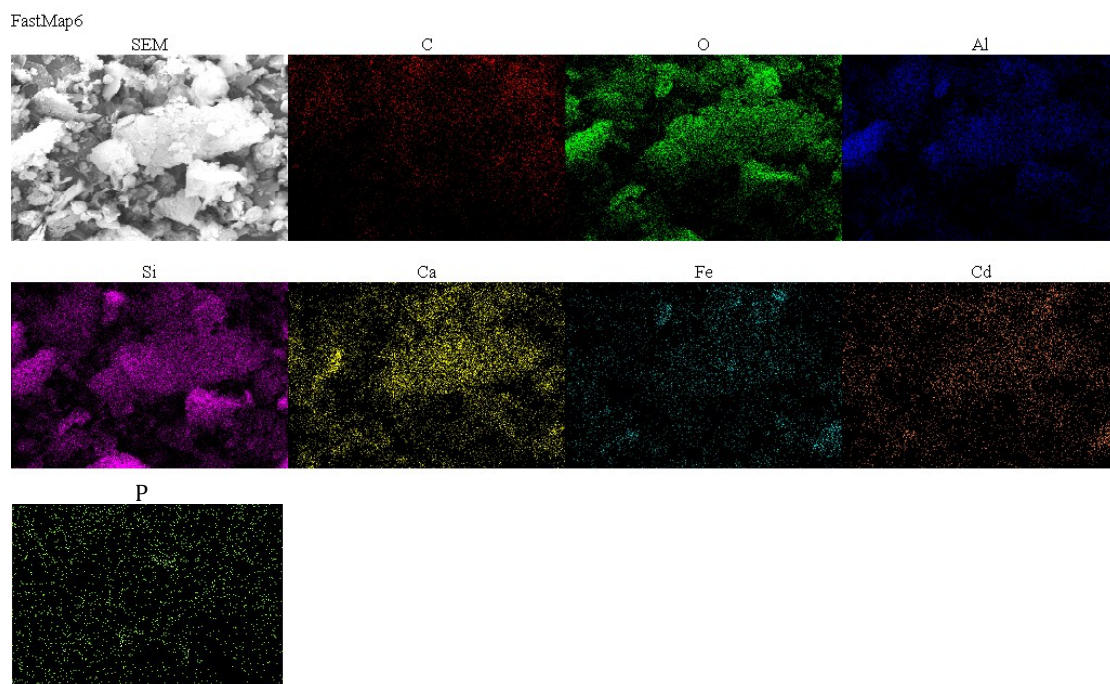

**Fig. S6** SEM image and EDX elemental mapping of the Cd(II) loaded CMSSB samples.
